# Supplementary material
Source: Elsevier journal article supplement (https://www.sciencedirect.com/science/article/pii/S0213911122000954)
Supplement: mmc2 [file S0213911122000954:mmc2.xlsx]

## Sheet: Instrucciones
Instrucciones
Esta hoja de cálculo sirve para representar gráficamente los resultados de las "Preguntas clave para integrar la participación efectiva en la respuesta a las crisis" que es un anexo del artículo "Participación comunitaria: aprendizajes covid para nuevas crisis" del Informe SESPAS 2022.
Se elabora un diagrama de araña para representar como es el desarrollo de la participación efectiva en cada una de las etapas de la crisis: Preparación, respuesta y preparación.
La valoración de los apartados se realiza de 1 a 10, según la respuesta a las preguntas clave. Con el debate sobre las preguntas se formulan propuestas de mejora de la participación para cada apartado. Hay 10 apartados, de los cuales hay cuatro que son comunes a las tres etapas de actuación frente a una crisis. Se transcribe la puntuación alcanzada en los diferentes apartados de la etapa analizad…
Escala para la puntuación:
1-2. No hay voluntad de poner en marcha esta medida. Las declaraciones no incluyen este aspecto o se está en contra de dicha propuesta.
3-4. Formalmente se declara partidario de esta medida o no se está en desacuerdo explícitamente, sin embargo, no hay actuaciones que incluyan enfoques, cauces y herramientas dirigidos a responder este apartado.
5-6. Existe una declaración más o menos explícita a favor del contenido de la pregunta. Existe un adecuado enfoque, pero la puesta en práctica es insuficiente por la falta de cauces y/o herramientas.
7-8. La gestión de la crisis acepta plenamente la propuesta planteada, existen cauces y herramientas desplegadas para su mantenimiento en el tiempo, sin embargo, hay bastantes oportunidades de mejora.
9-10. La respuesta al apartado implica un desarrollo excelente. Los grupos implicados valoran positivamente las iniciativas planteadas y los cauces y herramientas generan buenos resultados.

## Sheet: Preguntas clave
Preguntas clave para integrar la participación efectiva en la respuesta a las crisis
EN TODAS LAS ETAPAS	Puntuación de 1 a 10	Propuestas de mejora
1. Reconocer a la comunidad como aliada	1
¿La manera en que se gestionan las crisis favorece la transparencia y el trabajo colaborativo a diferentes niveles?
¿Existen cauces para favorecer la implicación de representantes de la comunidad en los equipos de gestión y en los órganos de consulta?
¿Existen canales para visibilizar los éxitos de la participación de la comunidad?
2. Comprender el contexto sociocultural de las comunidades	1
¿Existe un sistema de “escucha” que recoja y organice la información de diferentes fuentes (medios de comunicación, redes sociales, informantes clave, etc.)?
¿Se comprenden las preocupaciones, las percepciones del riesgo, las visiones, las necesidades y las prioridades de las personas de las diferentes comunidades?
¿Se han identificado las barreras existentes, así como los recursos comunitarios y los activos para la salud que pueden contribuir a manejar la crisis?
3. Potenciar la comunicación bidireccional	1
¿Se han previsto mecanismos que garanticen la comunicación bidireccional entre comunidades, responsables institucionales y profesionales de los servicios?
¿Se han identificado las necesidades de información y los canales de comunicación más adecuados para cada colectivo?
¿Los mensajes se han diseñado de forma colaborativa teniendo en cuenta las diferentes necesidades lingüísticas y características culturales?
4. Trabajar con las poblaciones vulnerables	1
¿Se han identificado los grupos más vulnerables en función del riesgo sanitario y social, de acuerdo con sus condiciones de vida?
¿Se plantean estrategias de prevención y control para lograr resultados de salud en las poblaciones de difícil acceso?
¿Se cuenta con representantes de estos colectivos y de las entidades que trabajan sobre el terreno en esas zonas?
ETAPA DE PREPARACIÓN	Puntuación de 1 a 10
5. Identificar los grupos interesados en las diferentes comunidades para su integración en el plan	1
¿Se han identificado de forma colaborativa las redes comunitarias, las asociaciones y los diferentes grupos interesados en las estrategias de prevención y control?
¿Se actualiza periódicamente la red de entidades, organizaciones y sus interlocutores?
¿Se ha valorado cómo se pueden articular y potenciar las diferentes redes existentes en el territorio?
6. Potenciar las relaciones de confianza y fortalecer la capacidad comunitaria	1
¿Se han identificado las necesidades formativas de los diferentes grupos interesados para el desarrollo de iniciativas que refuercen la respuesta en un contexto de crisis?
¿Existen diferentes modalidades de formación para apoyar a los grupos interesados en el desarrollo de las habilidades adecuadas a diferentes contextos?
¿Se ha previsto desarrollar proyectos de ciencia ciudadana que faciliten la gestión del conocimiento ante las situaciones cambiantes de la crisis sanitaria y social?
¿Se utilizan la tecnología y las plataformas digitales para facilitar los procesos de información y formación?
¿Se facilitan recursos y apoyos para superar la brecha digital en determinados colectivos?
ETAPA DE RESPUESTA	Puntuación de 1 a 10
7. Actuar a nivel local, con estrategias flexibles adaptadas a cada contexto	1
¿Se adaptan las estrategias de prevención y control para lograr que sean culturalmente apropiadas en diferentes contextos y comunidades?
¿Se hace seguimiento del exceso de información (infodemia), la desinformación y la circulación de bulos en los diferentes colectivos?
¿Se tiene en cuenta el conocimiento local que aportan los diferentes grupos interesados a la hora de analizar los riesgos e identificar los activos y los recursos comunitarios?
8. Reconocer y contar con las capacidades de las personas y las comunidades	1
¿Se integra a los agentes comunitarios en una etapa temprana de la planificación de las estrategias de prevención y control?
¿Existen documentos de recomendaciones para los agentes y grupos comunitarios elaborados en colaboración con la ciudadanía?
9. Dinamizar a través del compromiso con la comunidad	1
¿Existen criterios para gestionar la comunicación de los posibles riesgos y favorecer el empoderamiento y la movilización de la comunidad, evitando enfoques culpabilizadores?
ETAPA DE RECUPERACIÓN	Puntuación de 1 a 10
10. Integrar la participación en la evaluación	1
¿Se tienen en cuenta las perspectivas, necesidades, expectativas y propuestas de las comunidades en la evaluación de la gestión de la crisis?
¿Se integra la participación de las comunidades, los niveles locales y los grupos interesados en los procesos de evaluación?
¿Se analizan y documentan, de forma accesible, las lecciones aprendidas y la contribución de las iniciativas comunitarias en las estrategias desarrolladas?
¿Se comparten el aprendizaje y los resultados de la evaluación entre las instituciones, las comunidades y los grupos interesados, de forma accesible y adaptada a los diferentes públicos?

## Sheet: Diagrama de Araña
Diagrama de araña de la participación efectiva en respuesta a la crisis
A. Etapa de preparación
Apartado	Puntuación
1. Reconocer a la comunidad como aliada	1
2. Comprender el contexto sociocultural de las comunidades	1
3. Potenciar la comunicación bidireccional	1
4. Trabajar con las poblaciones vulnerables	1
5. Identificar los grupos interesados en las diferentes comunidades para su integración en el plan	1
6. Potenciar las relaciones de confianza y fortalecer la capacidad comunitaria	1
Porcentaje total	0.1
B. Etapa de respuesta
Apartado	Puntuación
1. Reconocer a la comunidad como aliada	1
2. Comprender el contexto sociocultural de las comunidades	1
3. Potenciar la comunicación bidireccional	1
4. Trabajar con las poblaciones vulnerables	1
7. Actuar a nivel local, con estrategias flexibles adaptadas a cada contexto.	1
8. Reconocer y contar con las capacidades de las personas y las comunidades.	1
9. Dinamizar a través del compromiso con la comunidad.	1
TOTAL	0.1
C. Etapa de recuperación
Apartado	Puntuación
1. Reconocer a la comunidad como aliada	1
2. Comprender el contexto sociocultural de las comunidades	1
3. Potenciar la comunicación bidireccional	1
4. Trabajar con las poblaciones vulnerables	1
10. Integrar la participación en la evaluación	1
TOTAL	0.1
